# Supplementary material for: Chip-based liquid phase microextraction combined with electrothermal vaporization-inductively coupled plasma mass spectrometry for trace metal determination in cell samples
Source: Royal Society of Chemistry journal article supplement (doi:10.1039/c3ja50223f), 2013-01-01
Supplement: c3ja50223f.pdf [file c3ja50223f.pdf]

Electronic Supplementary Information for:

**Chip-based liquid phase microextraction combined with  
electrothermal vaporization-inductively coupled plasma mass  
spectrometry for trace metal analysis in cell samples**

Han Wang,<sup>a</sup> Zhekuan Wu,<sup>a</sup> Yuan Zhang,<sup>a</sup> Beibei Chen,<sup>a</sup> Man He<sup>a</sup> and Bin Hu<sup>\*a</sup>

*Key Laboratory of Analytical Chemistry for Biology and Medicine (Ministry of Education),*

*Department of Chemistry, Wuhan University, Wuhan 430072, China*

\*Corresponding author: Dr. Bin Hu, E-mail: binhu @ whu.edu.cn, Fax: 86-27-68754067

*Contents:*

**Experimental**

**Fabrication of microfluidic devices**

**Sample preparation**

**Determination of the procedure blanks**

**Results and discussion**

**Effect of flow rate**

**Figures S1 to S2**

**Tables S1 to S3**

## **Fabrication of microfluidic devices**

Soft lithography and rapid prototyping with PDMS technology are employed for the fabrication of microfluidic devices. A transparent mask patterned with a high resolution laser printer was used to make a master on a silicon wafer with AZ 50 photoresist. Before PDMS casting, the master was exposed to trimethylchlorosilane vapor for 3 min to avoid the adhesion between PDMS and silicon wafer. GE RTV 615 (PDMS) component A and B were mixed at a ratio of 10:1 and cast on the master after air bubbles disappeared. After incubating at 75°C for 3 h, the solidified PDMS was peeled off, drilled on demand, and exposed to oxygen plasma together with a clean glass. Then the PDMS microfluidic chip was prepared by bonding the treated PDMS with the glass.

## **Sample preparation**

Two kinds of Certified Reference Materials, GBW07605 human hair and GBW09152 human serum, were employed for the validation of the accuracy of the proposed method. In addition, three kinds of real samples, human serum sample (Wuhan University Zhongnan Hospital, Wuhan, China), Jurkat cell sample and HepG2 cell sample, were analyzed. Details of the sample preparation are as follows.

The Certified Reference Materials and real human serum samples were weighed into PTFE digestion vessels. After adding 4 mL of HNO<sub>3</sub>, the vessels were put on a electric hot plate (85°C) for 3 h. The vessels were then placed on a turntable and subjected to microwave digestion. The microwave system was operated as follows: 5 min at 10 MPa and 150 °C, 5 min at 18 MPa and 180 °C, 5 min at 20 MPa and 200 °C. After the microwave treatment, the vessels were cooled in air to room temperature, and then put on an electric hot plate (85°C) again. When the samples were nearly dryness, the digest was transferred and diluted with highly pure deionized water. After the addition of an appropriate amount DDTC (concentration of 0.5% (m/v)) and adjusting of pH to 9.0, the samples were served to chip-based LPME-ETV-ICP-MS analysis.

In addition, Jurkat T cell (purchased from Wuhan University Center for Animal Experiment/A3-Lab, Wuhan, China) and HepG2 cell (kindly provided by Prof. Ying Zhu, College of Life Sciences, Wuhan University, Wuhan, China) samples were countered. After centrifugation, the supernatant was removed and the cells were washed with PBS twice. Then the amount of cells

was counted, and the density of HepG2 cells and Jurkat T cells were diluted to  $\sim 3.6 \times 10^5/\text{mL}$  and  $\sim 2.2 \times 10^6/\text{mL}$ , respectively. Then 1 mL of the cells dispersion were subjected to ultrasounication for 40 min. Next, a centrifuge was used to separate the cell sap and the deposit. The cell sap was transferred into a polyethylene tube, then an appropriate amount DDTC was added (concentration of 0.5% (m/v)) and the sample solution was adjusted to pH 9.0 with diluted NaOH solution and diluted to 2 mL with highly pure deionized water.

#### **Determination of the procedure blanks**

For the determination of procedure blanks, highly pure deionized water was used as the blank sample. After an appropriate amount DDTC was added (concentration of 0.5% (m/v)) and the pH was adjusted to 9.0, it was subjected to the chip-based LPME and the blank values were determined by ETV-ICP-MS.

#### **Effect of flow rate**

On a microfluidic chip, flow rate is a great influence factor on the system stability. If the flow rate is too high, it is hard to form stable laminar flow during the extraction. To examine the effect of flow rates, the organic phase flow rate was fixed at  $2 \mu\text{L min}^{-1}$ , while the aqueous phase flow rates were varied over the range of  $20\sim 100 \mu\text{L min}^{-1}$ . As can be seen in Fig. S-1, the aqueous phase occupied more space in the central channel with the increase of the flow rate, while the laminar flow was stable throughout the examination. Then the effect of flow rate on the extraction of target metal ions was studied with the organic phase flow rate ranging from  $1 \mu\text{L min}^{-1}$  to  $4 \mu\text{L min}^{-1}$  by fixing the flow rate ratio of aqueous phase to organic phase at 40:1, and the results are shown in Fig. S-2. The extraction efficiency was not decreased obviously with increasing flow rate from 1 to  $3 \mu\text{L min}^{-1}$ , and then decreased with further increasing the flow rate to  $4 \mu\text{L min}^{-1}$ . Therefore,  $2 \mu\text{L min}^{-1}$  was selected as the organic phase flow rate, and accordingly the aqueous phase flow rate was  $80 \mu\text{L min}^{-1}$ . After extraction for 3.5 min, 7  $\mu\text{L}$  of the organic solvent was collected and introduced into ETV-ICP-MS for subsequent analysis, and 280  $\mu\text{L}$  of sample solution was consumed.

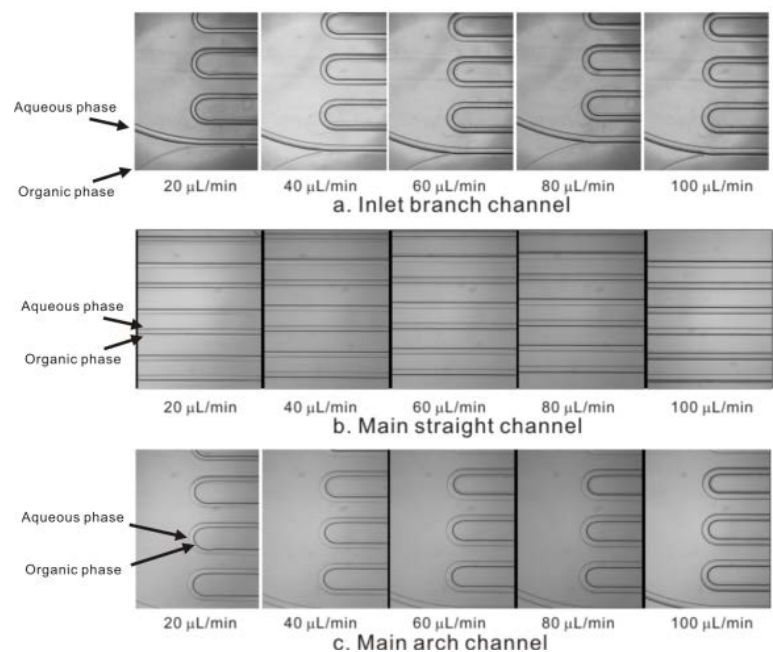

**Fig. S1** Visible light images of the extraction of complex from aqueous phase to the organic phase.

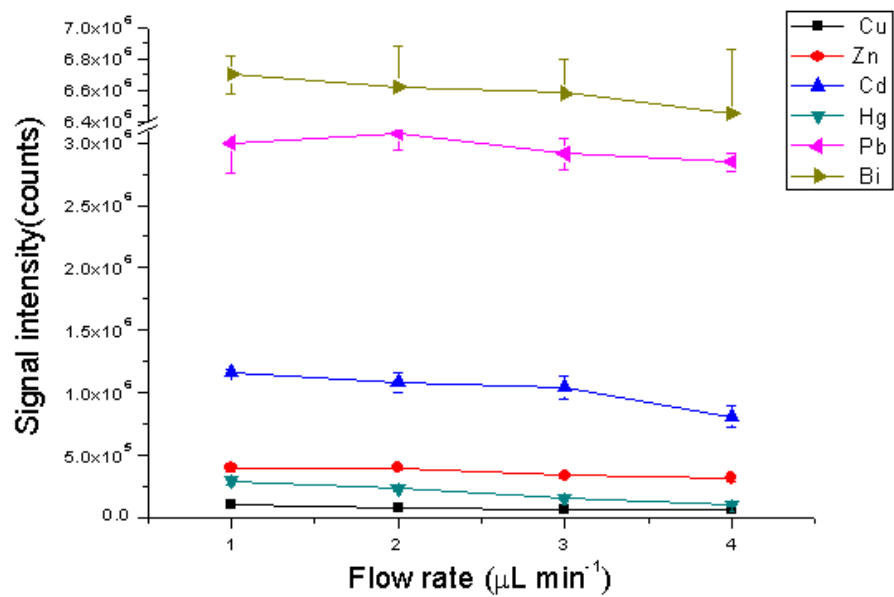

**Fig. S2** Influence of flow rate on signal intensity in chip-based LPME.

**Table S1** Influence of coexisting ions

| Coexisting ions    | Tolerance concentration ( $\mu\text{g mL}^{-1}$ ) |       |       |      |       |       |
|--------------------|---------------------------------------------------|-------|-------|------|-------|-------|
|                    | Cu                                                | Zn    | Cd    | Hg   | Pb    | Bi    |
| $\text{K}^+$       | 5000                                              | 10000 | 10000 | 5000 | 10000 | 10000 |
| $\text{Na}^+$      | 5000                                              | 5000  | 10000 | 5000 | 10000 | 1000  |
| $\text{Ca}^{2+}$   | 5000                                              | 1000  | 5000  | 5000 | 1000  | 5000  |
| $\text{Mg}^{2+}$   | 1000                                              | 1000  | 1000  | 1000 | 1000  | 500   |
| $\text{Fe}^{3+}$   | 0.5                                               | 0.5   | 0.2   | 1    | 1     | 1     |
| $\text{Al}^{3+}$   | 1                                                 | 1     | 1     | 1    | 1     | 1     |
| $\text{Cl}^-$      | 8000                                              | 16000 | 16000 | 8000 | 16000 | 16000 |
| $\text{NO}_3^-$    | 8000                                              | 8000  | 16000 | 8000 | 16000 | 1600  |
| $\text{SO}_4^{2-}$ | 5000                                              | 2000  | 5000  | 5000 | 2000  | 2000  |

**Table S2** Preparation reproducibility

| Analytes | Chip to chip RSD                  | Batch to batch RSD                |
|----------|-----------------------------------|-----------------------------------|
|          | (%,n=4, c=5 ng mL <sup>-1</sup> ) | (%,n=5, c=5 ng mL <sup>-1</sup> ) |
| Cu       | 6.37                              | 9.35                              |
| Zn       | 5.46                              | 7.56                              |
| Cd       | 3.18                              | 4.82                              |
| Hg       | 4.74                              | 6.59                              |
| Pb       | 7.35                              | 6.74                              |
| Bi       | 5.46                              | 7.46                              |

**Table S3** Comparison of LODs found in literatures following different analytical approaches.

| Methods                                                                                 | LOD ( $\text{pg mL}^{-1}$ ) |      |     |      |      |     | Time<br>(min) | Volume<br>(mL) | Refs.        |
|-----------------------------------------------------------------------------------------|-----------------------------|------|-----|------|------|-----|---------------|----------------|--------------|
|                                                                                         | Cu                          | Zn   | Cd  | Hg   | Pb   | Bi  |               |                |              |
| Chip-based<br>LPME-ETV-ICP-MS<br>micro-fluidic sample<br>introduction system-<br>ICP-MS | 89.3                        | 59.8 | 7.5 | 21.6 | 19.2 | 6.6 | 3.5           | 0.28           | This<br>work |
| HF-LPME-ETV-ICP-MS                                                                      | 12.4                        | 28.7 | 4.5 | 3.3  | 4.8  | 1.6 | 15            | 2.5            | [20]         |
| SPE-FI-ICP-MS                                                                           | 30                          | 260  | 4   | -    | 20   | -   | 13.5          | 1.8            | [22]         |
| MNPs-SPE-ICP-OES                                                                        | -                           | 200  | 300 | -    | 800  | -   | 5             | 50             | [23]         |
| MNPs-ICP-MS                                                                             | 600                         | 600  | -   | -    | 60   | -   | 5             | 15             | [24]         |
